# Supplementary material for: Anti-inflammatory evaluation of the methanolic extract of Taraxacum officinale in LPS-stimulated human umbilical vein endothelial cells
Source: PubMed Central journal article supplement (PMC5707789; doi:10.1186/s12906-017-2022-7), 2017-11-29
Supplement: 12906_2017_2022_MOESM1_ESM.pdf [file 12906_2017_2022_MOESM1_ESM.pdf]

# Additional files

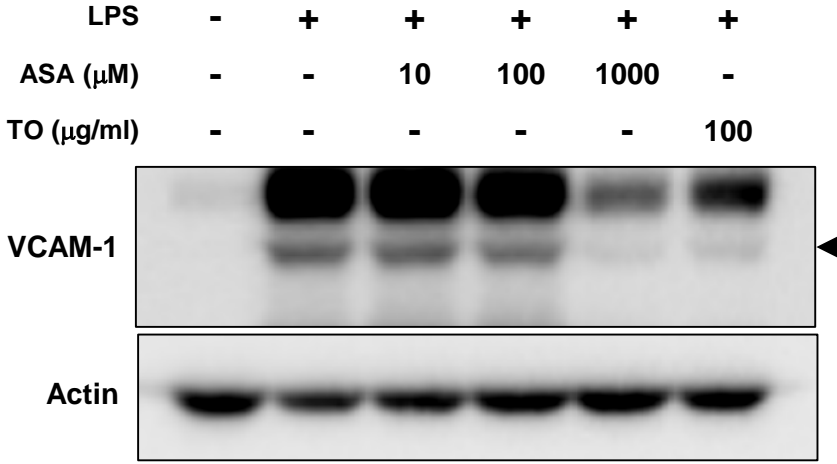

**Additional file 1: Figure S1. Comparison of TO efficacy with acetylsalicylic acid (ASA).** HUVECs were pretreated with TO (100  $\mu\text{g/ml}$ ) or different concentrations of ASA for one hour, and then stimulated with 1  $\mu\text{g/ml}$  LPS for 24 h. VCAM-1 and actin levels were assessed by Western blot analysis. Arrow head indicates VCAM-1.

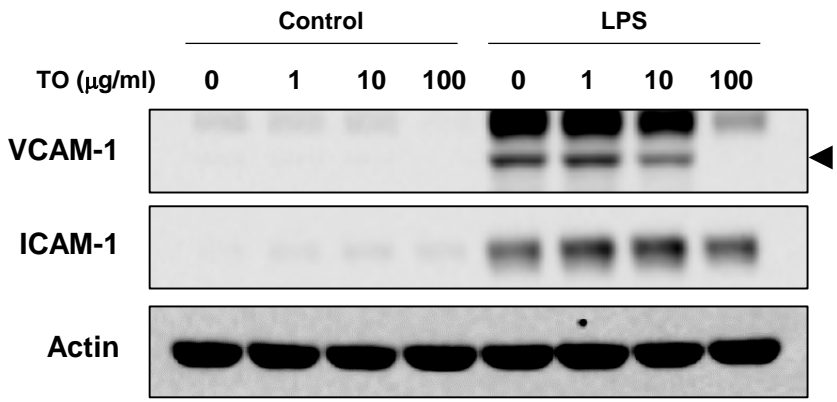

**Additional file 1: Figure S2. TO decreases VCAM-1 induction dose dependently but does not affect ICAM-1 levels in LPS-stimulated HUVECs.** HUVECs were pretreated with different concentrations of TO for one hour, and then stimulated with 1  $\mu\text{g/ml}$  LPS for 24 h. VCAM-1, ICAM-1, and actin levels were assessed by Western blot analysis. Arrow head indicates VCAM-1.

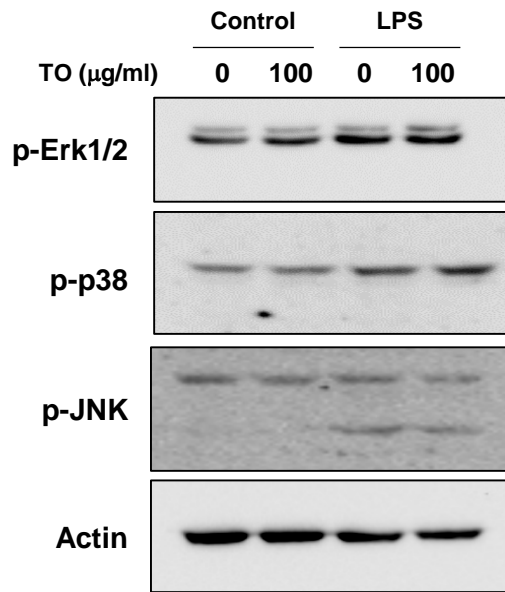

**Additional file 1: Figure S3. TO does not affect MAPK activation induced by LPS stimulation**  
 HUVECs were preincubated with TO (100  $\mu\text{g/ml}$ ) for one hour and then stimulated with LPS (1  $\mu\text{g/ml}$ ) for 30 min. MAPKs activation was assessed by Western blot analysis.
